# Supplementary material for: Protective Effects of Feruloyl Oligosaccharides from Fermented Wheat Bran against Oxidative Stress in IPEC-J2 Cells In Vitro and in a Zebrafish Model In Vivo
Source: Hindawi journal article supplement (doi:10.1155/2022/8001728), 2022-04-14
Supplement: f1 [file 8001728.f1.zip]

Archive with 2 entries (2 files):
- 8001728.f1/Figure S1.emf
- 8001728.f1/Figure S2.emf
